# Supplementary material
Source: publisher figshare collection journal article supplement (https://gsajournals.figshare.com/ndownloader/files/18059192)
Supplement: Supplementary file 1 [file 18059192]

**Table S1. Isolation and DNA concentration data**

| **Isolation Date** | **Volume (ul)** | **DNA Conc. (ng/ul)** | **OD 260/280** | **OD 260/320** |
| --- | --- | --- | --- | --- |
| 07/2-5/2014 | 2x 120.0 | 94.2 | 1.92 | 0.42 |
| 11/19/2014 | 1x 146.0 | 80.2 | 2.00 | 0.43 |
